# Supplementary material for: Segregation Distortion for Male Parents in High Density Genetic Maps from Reciprocal Crosses between Two Self-Incompatible Cultivars Confirms a Gametophytic System for Self-Incompatibility in Citrus
Source: MDPI journal article supplement (doi:10.3390/agriculture11050379), 2021-04-23

**Supplementary figure 3** : Parentage of 'Fortune' mandarin and contribution of its grandparent genomes ('Commune' mandarin, sweet orange, 'Dancy' mandarin and grapefruit) to its genomic structure.

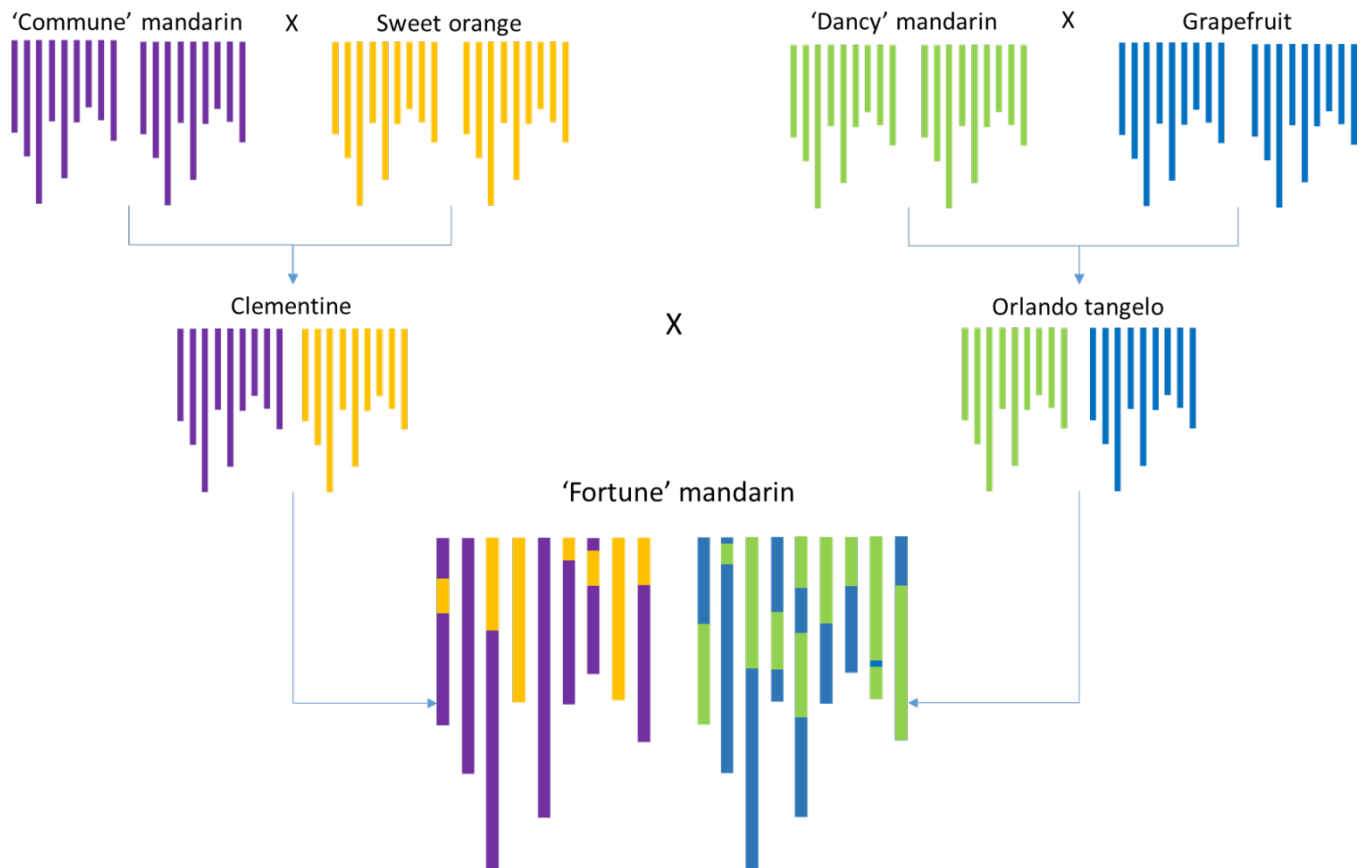

Supplement: s1 [file s1]
