# Supplementary material for: Segregation Distortion for Male Parents in High Density Genetic Maps from Reciprocal Crosses between Two Self-Incompatible Cultivars Confirms a Gametophytic System for Self-Incompatibility in Citrus
Source: MDPI journal article supplement (doi:10.3390/agriculture11050379), 2021-04-23

**Supplementary figure 4** : Analysis of potential SI haplotypes according to the flanking sequences of the SI locus; Neighbor-joining analysis of haplotypes for markers located before the recombination event in the 'Fortune' FH1 maternal gamete.

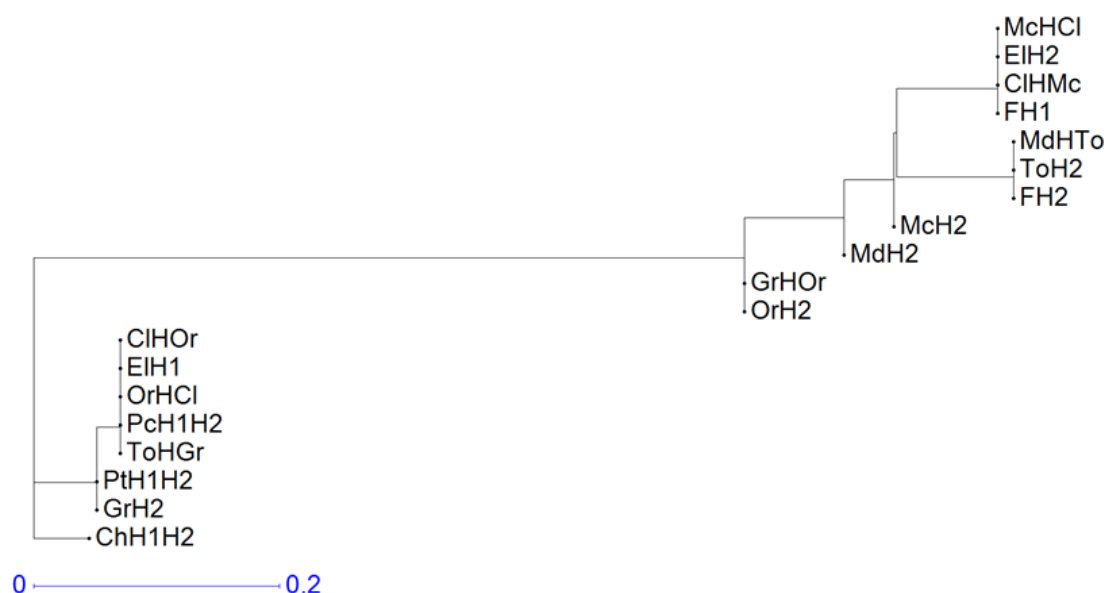

Supplement: s1 [file s1]
