# Supplementary material for: Segregation Distortion for Male Parents in High Density Genetic Maps from Reciprocal Crosses between Two Self-Incompatible Cultivars Confirms a Gametophytic System for Self-Incompatibility in Citrus
Source: MDPI journal article supplement (doi:10.3390/agriculture11050379), 2021-04-23
Supplement: s1 [file s1]

**Supplementary table 3** Genotypic frequencies of the ‘Ellendale’ x ‘Fortune’ (ElFor) and ‘Fortune x Ellendale’ (ForEl) hybrids in the vicinity of the SI locus

A: genotypic frequencies of ‘ElFor’ progenies for markers homozygous in ‘Ellendale’ and heterozygous in ‘Fortune’

|             |      |          |     |     |           |         |     |     | ElFor hybrids genotypic frequencies |        |      |
|-------------|------|----------|-----|-----|-----------|---------|-----|-----|-------------------------------------|--------|------|
| Marker      | Chr. | Position | Ref | Alt | Ellendale | Fortune | FH1 | FH2 | 0                                   | 0.5    | 1    |
| S07_869201  | 7    | 869201   | A   | G   | 0         | 0.5     | 0   | 1   | 1.1%                                | 98.9%  | 0.0% |
| S07_1296255 | 7    | 1296255  | C   | T   | 0         | 0.5     | 0   | 1   | 0.0%                                | 100.0% | 0.0% |
| S07_1310473 | 7    | 1310473  | G   | A   | 0         | 0.5     | 0   | 1   | 0.0%                                | 100.0% | 0.0% |
| S07_1363046 | 7    | 1363046  | G   | A   | 0         | 0.5     | 0   | 1   | 1.1%                                | 98.9%  | 0.0% |
| S07_1369079 | 7    | 1369079  | A   | T   | 0         | 0.5     | 0   | 1   | 1.1%                                | 98.9%  | 0.0% |

0 : homozygosity for reference allele (Ref); 0.5 : heterozygosity ; 1 : homozygosity for alternative allele (Alt)

B: genotypic frequencies of ‘ForEl’ progenies for markers homozygous in ‘Fortune’ and heterozygous in ‘Ellendale’.

|             |      |          |     |     |         |           |      |      | ForEl hybrids genotypic frequencies |       |      |
|-------------|------|----------|-----|-----|---------|-----------|------|------|-------------------------------------|-------|------|
| Marker      | Chr. | Position | Ref | Alt | Fortune | Ellendale | ElH1 | ElH2 | 0                                   | 0.5   | 1    |
| S07_601330  | 7    | 601330   | C   | T   | 0       | 0.5       | 1    | 0    | 100.0%                              | 0.0%  | 0.0% |
| S07_630796  | 7    | 630796   | A   | C   | 0       | 0.5       | 1    | 0    | 100.0%                              | 0.0%  | 0.0% |
| S07_635350  | 7    | 635350   | G   | A   | 0       | 0.5       | 1    | 0    | 100.0%                              | 0.0%  | 0.0% |
| S07_635351  | 7    | 635351   | C   | T   | 0       | 0.5       | 1    | 0    | 100.0%                              | 0.0%  | 0.0% |
| S07_635374  | 7    | 635374   | C   | T   | 0       | 0.5       | 1    | 0    | 100.0%                              | 0.0%  | 0.0% |
| S07_717478  | 7    | 717478   | A   | C   | 0       | 0.5       | 1    | 0    | 100.0%                              | 0.0%  | 0.0% |
| S07_717509  | 7    | 717509   | T   | G   | 0       | 0.5       | 1    | 0    | 100.0%                              | 0.0%  | 0.0% |
| S07_760712  | 7    | 760712   | T   | C   | 0       | 0.5       | 1    | 0    | 100.0%                              | 0.0%  | 0.0% |
| S07_760716  | 7    | 760716   | C   | T   | 0       | 0.5       | 1    | 0    | 100.0%                              | 0.0%  | 0.0% |
| S07_869995  | 7    | 869995   | C   | A   | 0       | 0.5       | 1    | 0    | 100.0%                              | 0.0%  | 0.0% |
| S07_869997  | 7    | 869997   | A   | T   | 0       | 0.5       | 1    | 0    | 100.0%                              | 0.0%  | 0.0% |
| S07_1180894 | 7    | 1180894  | A   | G   | 1       | 0.5       | 1    | 0    | 0.0%                                | 97.5% | 2.5% |
| S07_1369096 | 7    | 1369096  | T   | G   | 1       | 0.5       | 1    | 0    | 0.0%                                | 97.6% | 2.4% |
| S07_1381530 | 7    | 1381530  | T   | G   | 1       | 0.5       | 1    | 0    | 0.0%                                | 97.6% | 2.4% |

0 : homozygosity for reference allele (Ref); 0.5 : heterozygosity ; 1 : homozygosity for alternative allele (Alt)
