# Supplementary material for: Segregation Distortion for Male Parents in High Density Genetic Maps from Reciprocal Crosses between Two Self-Incompatible Cultivars Confirms a Gametophytic System for Self-Incompatibility in Citrus
Source: MDPI journal article supplement (doi:10.3390/agriculture11050379), 2021-04-23
Supplement: s1 [file s1]

**Supplementary figure 1:** Marey map plot of the nine linkage groups of ‘Fortune’ mandarin (A) and ‘Ellendale’ tangor (B) compared with the clementine reference genome (Wu et al., 2014)

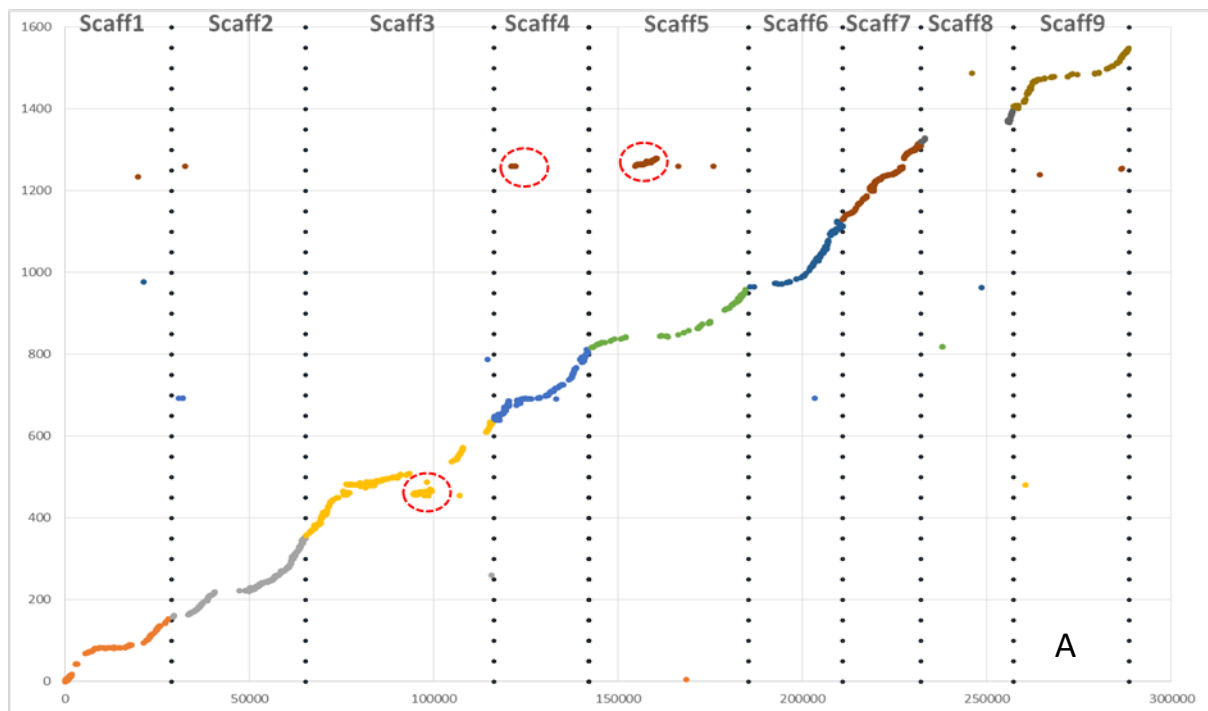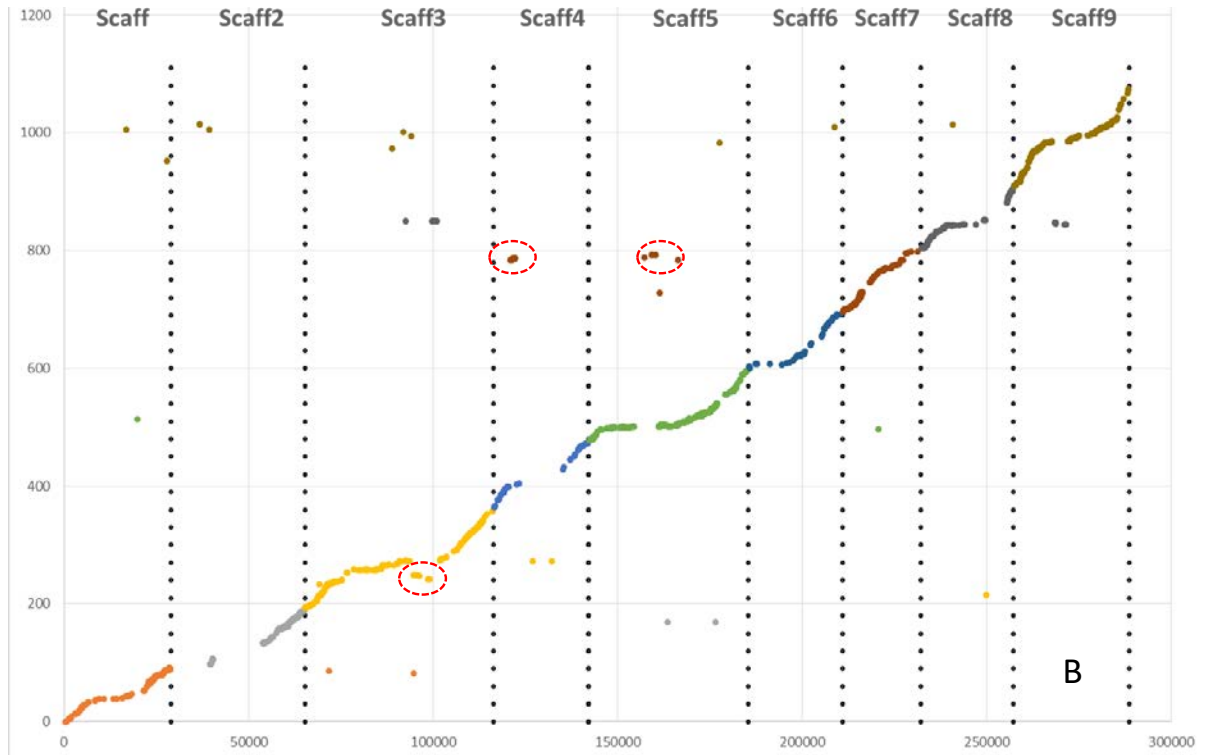

The x-axis represents the physical positions on the clementine reference genome and y-axis represents the position on the ‘Fortune’ mandarin and ‘Ellendale’ tangor genetic maps. The red circles indicate the main incongruences shared by ‘Fortune’ and ‘Ellendale’ genetic maps.
