# Supplementary material for: Segregation Distortion for Male Parents in High Density Genetic Maps from Reciprocal Crosses between Two Self-Incompatible Cultivars Confirms a Gametophytic System for Self-Incompatibility in Citrus
Source: MDPI journal article supplement (doi:10.3390/agriculture11050379), 2021-04-23
Supplement: s1 [file s1]

Ollitrault P., Ahmed D., Costantino G., Evrard J.C., Cardi C. Mournet P., Perdereau A., Froelicher Y. Segregation distortion analysis for male parents in high density genetic maps from reciprocal crosses between two self-incompatible cultivars confirms a gametophytic system for self-incompatibility in citrus with the S locus located on chromosome 7 of the reference clementine genome. **Agricultures**.

**Supplementary figure 2** : Similarity of haplotypes along the genome; A: ‘Fortune’ mandarin with clementine; B: ‘Ellendale’ tangor with sweet orange.

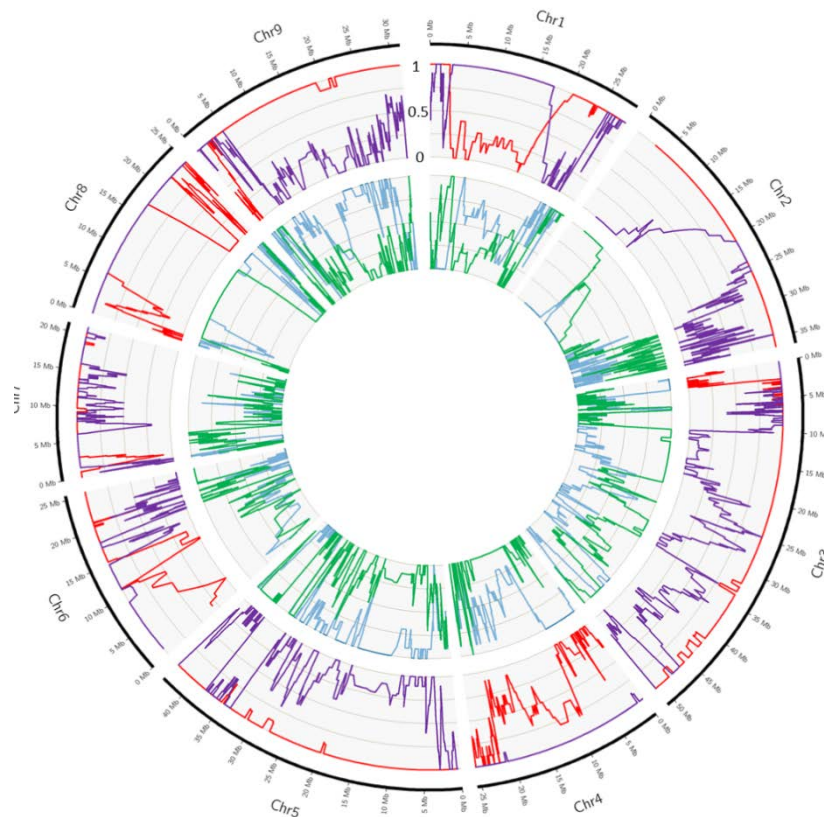

A: red: FH1 / ClemMC; purple: FH1 / ClemOr; blue: FH2 /ClemMC; green: FH2/ClemOr

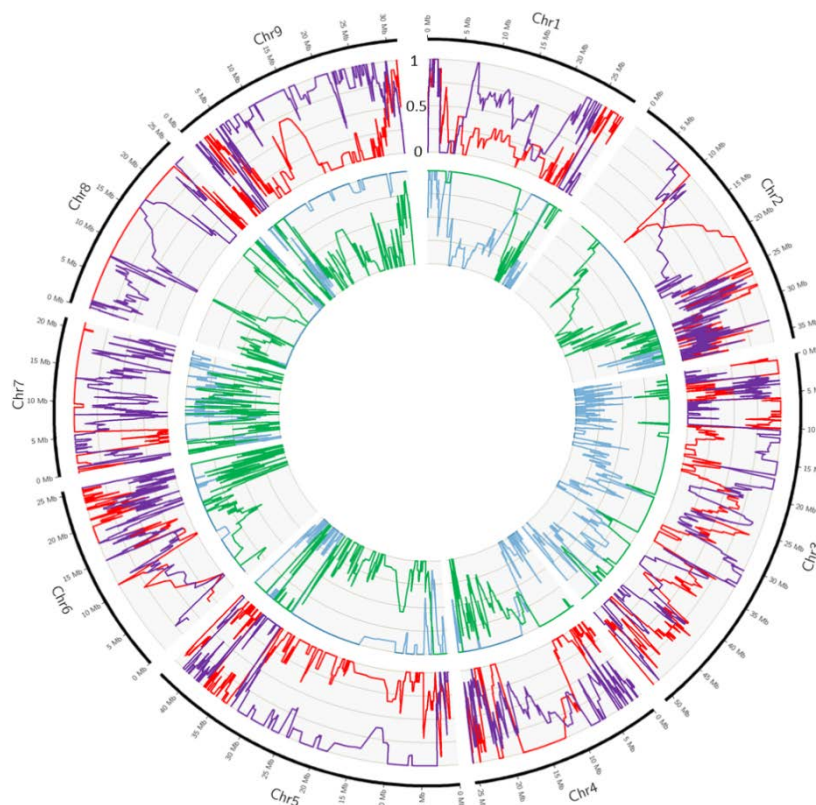

B: red: EI11 / OrHCl; purple: EI11 / OrH2; blue: EI12 /OrHCl; green: EI12 / OrH2
